# Supplementary material for: Two-stage comprehensive evaluation of genetic susceptibility of common variants in FBXO38, AP3B2 and WHAMM to severe chronic periodontitis
Source: PubMed Central journal article supplement (PMC4672326; doi:10.1038/srep17882), 2015-12-08
Supplement: srep17882-s1.pdf [file srep17882-s1.pdf]

**Title:** Two-stage comprehensive evaluation of genetic susceptibility of common variants in *FBXO38*, *AP3B2* and *WHAMM* to severe chronic periodontitis

**Author names and affiliations:** Dong Shang <sup>a,b,\*</sup>, Li Dong <sup>c,\*</sup>, Lingfang Zeng <sup>d</sup>, Rui Yang <sup>e</sup>, Jing Xu <sup>f</sup>, Yue Wu <sup>g</sup>, Ran Xu <sup>a</sup>, Hong Tao <sup>a</sup> and Nan Zhang <sup>a</sup>

<sup>a</sup> Department of Stomatology, the First Affiliated Hospital, School of Medicine, Xi'an Jiaotong University, Xi'an, China

<sup>b</sup> Department of Respiratory, the First Affiliated Hospital, School of Medicine, Xi'an Jiaotong University, Xi'an, China;

<sup>c</sup> Department of Computer Science, Shandong Medical College, Jinan, China;

<sup>d</sup> Department of Pediatric Stomatology, Jinan Stomatological Hospital, Jinan, China;

<sup>e</sup> Tian-rui Institute of Stomatology, Xi'an, China;

<sup>f</sup> Department of Emergency, the First Affiliated Hospital, School of Medicine, Xi'an Jiaotong University, Xi'an, China

<sup>g</sup> Department of Cardiology, the First Affiliated Hospital, School of Medicine, Xi'an Jiaotong University, Xi'an, China

\* These authors contributed equally to this work.

**Corresponding Author:**

Hong Tao, Ph.D., M.D., Department of Stomatology, the First Affiliated Hospital, School of Medicine, Xi'an Jiaotong University, 277 Yanta West Road, Xi'an, China, 710061.

Tel: +86-29-85324154, Fax: +86-29-85324142, E-mail: taohong0228@126.com

Nan Zhang, Ph.D., M.D., Department of Stomatology, the First Affiliated Hospital, School of Medicine, Xi'an Jiaotong University, 277 Yanta West Road, Xi'an, China,

710061. Tel: +86-29-85324156, Fax: +86-29-85324141, E-mail: nanzhangnz@126.com

Table S1 Results of intra- and inter-examiner calibration for pocket depth

| Trainee | Intra-examiner calibration |      | Inter-examiner calibration |         |         |         |         |         |
|---------|----------------------------|------|----------------------------|---------|---------|---------|---------|---------|
|         | K-test                     | ICC  | K-test                     | ICC     | K-test  | ICC     | K-test  | ICC     |
| 1       | 0.84                       | 0.81 | 2: 0.81                    | 2: 0.77 | 3: 0.91 | 3: 0.81 | 4: 0.83 | 4: 0.80 |
| 2       | 0.77                       | 0.73 | 3: 0.90                    | 3: 0.83 | 4: 0.82 | 4: 0.79 |         |         |
| 3       | 0.80                       | 0.76 | 4: 0.91                    | 4: 0.86 |         |         |         |         |
| 4       | 0.92                       | 0.87 |                            |         |         |         |         |         |

K-test = Kappa test; ICC = Intra-class Coefficient Correlation

Table S2. Statistical power of single SNP based analysis.

| Relative risk | MAF of the underlying risk allele |        |        |        |        |
|---------------|-----------------------------------|--------|--------|--------|--------|
|               | 0.05                              | 0.1    | 0.2    | 0.3    | 0.4    |
| 1.1           | 0.0598                            | 0.0863 | 0.1778 | 0.2696 | 0.1594 |
| 1.2           | 0.0901                            | 0.2038 | 0.5512 | 0.7682 | 0.4701 |
| 1.3           | 0.1431                            | 0.4007 | 0.8759 | 0.9770 | 0.7844 |
| 1.4           | 0.2203                            | 0.6267 | 0.9834 | 0.9992 | 0.9422 |
| 1.5           | 0.3196                            | 0.8122 | 0.9989 | 1      | 0.9889 |

Table S3. Results of single marker based association analysis in discovery stage.

| SNP      | CHR               | POS              | Gene          | HWE           | MAF           | A1       | P             | OR          |
|----------|-------------------|------------------|---------------|---------------|---------------|----------|---------------|-------------|
| 5        | rs10515610        | 148373526        | FBXO38        | 0.7779        | 0.2743        | G        | 0.1070        | 1.15        |
| 5        | rs12521065        | 148374991        | FBXO38        | 0.6468        | 0.2448        | T        | 0.0720        | 1.17        |
| 5        | rs1345741         | 148375556        | FBXO38        | 0.9511        | 0.3486        | C        | 0.1323        | 1.13        |
| 5        | rs4705252         | 148381722        | FBXO38        | 0.6893        | 0.2956        | C        | 0.6012        | 1.05        |
| 5        | rs3812011         | 148383034        | FBXO38        | 0.9411        | 0.2493        | T        | 0.8164        | 1.02        |
| 5        | rs2112761         | 148384188        | FBXO38        | 0.535         | 0.339         | T        | 0.3030        | 1.09        |
| 5        | rs17720107        | 148384797        | FBXO38        | 0.6536        | 0.2468        | G        | 0.5149        | 1.06        |
| <b>5</b> | <b>rs10068216</b> | <b>148393755</b> | <b>FBXO38</b> | <b>0.8736</b> | <b>0.2322</b> | <b>G</b> | <b>0.0379</b> | <b>1.20</b> |
| 5        | rs10072051        | 148395099        | FBXO38        | 0.372         | 0.251         | G        | 0.2706        | 1.10        |
| <b>5</b> | <b>rs10044061</b> | <b>148396934</b> | <b>FBXO38</b> | <b>0.5725</b> | <b>0.2288</b> | <b>G</b> | <b>0.0270</b> | <b>1.22</b> |
| 5        | rs10041283        | 148397235        | FBXO38        | 0.6022        | 0.2005        | G        | 0.5374        | 1.06        |
| 5        | rs17776882        | 148400189        | FBXO38        | 0.6248        | 0.3472        | A        | 0.4350        | 1.06        |
| 5        | rs4599524         | 148405164        | FBXO38        | 0.7501        | 0.3231        | C        | 0.1567        | 1.12        |
| 5        | rs4705254         | 148405446        | FBXO38        | 0.536         | 0.4394        | C        | 0.1498        | 1.12        |
| 5        | rs9325095         | 148405595        | FBXO38        | 0.1493        | 0.2616        | G        | 0.4736        | 1.06        |
| <b>5</b> | <b>rs10477376</b> | <b>148405651</b> | <b>FBXO38</b> | <b>0.6213</b> | <b>0.2224</b> | <b>G</b> | <b>0.0248</b> | <b>1.23</b> |
| 5        | rs4349707         | 148408875        | FBXO38        | 1             | 0.2796        | C        | 0.5839        | 1.05        |
| 5        | rs10077690        | 148409235        | FBXO38        | 0.6482        | 0.244         | G        | 0.1619        | 1.13        |
| 5        | rs17720191        | 148410158        | FBXO38        | 1             | 0.3231        | G        | 0.1283        | 1.13        |
| 5        | rs17720226        | 148413176        | FBXO38        | 0.3574        | 0.1447        | A        | 0.0848        | 1.20        |
| 5        | rs12717973        | 148414408        | FBXO38        | 0.7101        | 0.2468        | A        | 0.8754        | 1.01        |
| 5        | rs17776978        | 148414498        | FBXO38        | 0.3473        | 0.1405        | T        | 0.1734        | 1.15        |
| <b>5</b> | <b>rs17108251</b> | <b>148415019</b> | <b>FBXO38</b> | <b>0.6698</b> | <b>0.2117</b> | <b>T</b> | <b>0.0266</b> | <b>1.22</b> |
| 5        | rs10055430        | 148417976        | FBXO38        | 0.8525        | 0.3292        | A        | 0.2691        | 0.91        |
| <b>5</b> | <b>rs10043775</b> | <b>148425557</b> | <b>FBXO38</b> | <b>0.7643</b> | <b>0.2549</b> | <b>C</b> | <b>0.0121</b> | <b>1.24</b> |
| 5        | rs12513547        | 148431902        | FBXO38        | 0.7712        | 0.2616        | C        | 0.1215        | 1.14        |
| 5        | rs6861078         | 148433338        | FBXO38        | 0.6163        | 0.3295        | T        | 0.7291        | 1.03        |
| 5        | rs10051223        | 148439803        | FBXO38        | 0.8525        | 0.3345        | T        | 0.9217        | 0.99        |
| <b>5</b> | <b>rs9325097</b>  | <b>148440782</b> | <b>FBXO38</b> | <b>0.3198</b> | <b>0.2193</b> | <b>A</b> | <b>0.0496</b> | <b>1.19</b> |
| 5        | rs3734120         | 148441906        | FBXO38        | 0.05581       | 0.2496        | T        | 0.8926        | 0.99        |
| 5        | rs4274968         | 148446027        | FBXO38        | 0.1766        | 0.2426        | T        | 0.9926        | 1.00        |
| 5        | rs9325098         | 148447875        | FBXO38        | 0.2857        | 0.2672        | T        | 0.3500        | 1.08        |
| 15       | rs11631963        | 82649451         | AP3B2         | 0.652         | 0.4248        | T        | 0.4637        | 0.95        |
| 15       | rs11637433        | 82652585         | AP3B2         | 0.7367        | 0.4403        | A        | 0.6968        | 1.03        |
| 15       | rs1864699         | 82654567         | AP3B2         | 0.5053        | 0.4627        | A        | 0.6677        | 1.03        |
| 15       | rs2099259         | 82654937         | AP3B2         | 0.7383        | 0.4487        | C        | 0.4005        | 0.94        |
| 15       | rs2278355         | 82662403         | AP3B2         | 0.8202        | 0.4148        | T        | 0.9390        | 0.99        |
| 15       | rs7494860         | 82665667         | AP3B2         | 0.867         | 0.4481        | T        | 0.9751        | 1.00        |
| 15       | rs6603033         | 82667123         | AP3B2         | 0.8243        | 0.4635        | A        | 0.8267        | 1.02        |
| 15       | rs4779041         | 82668307         | AP3B2         | 0.8231        | 0.4462        | G        | 0.7908        | 1.02        |
| 15       | rs4779046         | 82674020         | AP3B2         | 0.7128        | 0.2549        | A        | 0.2507        | 1.10        |
| 15       | rs1431717         | 82676117         | AP3B2         | 0.9408        | 0.2482        | C        | 0.7184        | 1.03        |
| 15       | rs17158372        | 82678246         | AP3B2         | 0.1771        | 0.1052        | G        | 0.3891        | 1.11        |

|    |                  |                 |                   |               |              |          |               |             |
|----|------------------|-----------------|-------------------|---------------|--------------|----------|---------------|-------------|
| 15 | rs1075845        | 82681865        | AP3B2             | 1             | 0.2785       | T        | 0.4780        | 1.06        |
| 15 | rs8043401        | 82687507        | AP3B2             | 0.4315        | 0.4428       | A        | 0.0919        | 1.14        |
| 15 | rs17158369       | 82688976        | AP3B2             | 0.4245        | 0.1408       | T        | 0.9201        | 1.01        |
| 15 | rs17841171       | 82689636        | AP3B2             | 0.2314        | 0.2291       | G        | 0.0953        | 1.16        |
| 15 | rs17158366       | 82692328        | AP3B2             | 0.6411        | 0.2372       | A        | 0.1518        | 1.13        |
| 15 | rs4779050        | 82699986        | AP3B2             | 0.7395        | 0.4762       | T        | 0.2711        | 1.09        |
| 15 | rs12148608       | 82713350        | AP3B2             | 0.4199        | 0.2445       | A        | 0.1176        | 0.87        |
| 15 | rs7182320        | 82719000        | AP3B2             | 1             | 0.2574       | A        | 0.5639        | 1.05        |
| 15 | <b>rs2890313</b> | <b>82748701</b> | <b>AP3B2/FSD2</b> | <b>0.9108</b> | <b>0.152</b> | <b>C</b> | <b>0.0303</b> | <b>1.24</b> |
| 15 | rs12910606       | 82799903        | WHAMM             | 0.5006        | 0.2515       | A        | 0.0611        | 1.18        |
| 15 | rs1553883        | 82803597        | WHAMM             | 0.6323        | 0.1739       | A        | 0.7963        | 0.97        |
| 15 | rs8042254        | 82809417        | WHAMM             | 0.5325        | 0.2779       | A        | 0.4005        | 1.07        |
| 15 | rs12907810       | 82825299        | WHAMM             | 0.8778        | 0.2339       | C        | 0.8808        | 0.99        |
| 15 | rs4779068        | 82826149        | WHAMM             | 0.9017        | 0.3298       | A        | 0.1768        | 0.90        |
| 15 | rs17158267       | 82828837        | WHAMM             | 0.8425        | 0.168        | A        | 0.6235        | 1.05        |
| 15 | rs17158263       | 82828908        | WHAMM             | 0.9429        | 0.2644       | T        | 0.2966        | 1.09        |
| 15 | rs8041231        | 82830043        | WHAMM             | 0.9087        | 0.4069       | T        | 0.6178        | 1.04        |
| 15 | rs3814281        | 82831014        | WHAMM             | 0.9373        | 0.2271       | A        | 0.9240        | 1.01        |
| 15 | rs17158255       | 82835068        | WHAMM             | 0.8543        | 0.1848       | A        | 0.8434        | 1.02        |
| 15 | rs4779069        | 82836510        | WHAMM             | 0.1375        | 0.3357       | C        | 0.9675        | 1.00        |
| 15 | rs2046071        | 82838299        | WHAMM             | 0.946         | 0.281        | A        | 0.4279        | 0.93        |
| 15 | rs1271044        | 82843501        | WHAMM             | 0.3812        | 0.3374       | G        | 0.0894        | 1.17        |

SNPs that passed the discovery stage threshold were shown in bold.

Table S4. Results of haplotype association analysis based on the discovery stage data.

| Locus | CHR | Haplotype | Haplotype freq. | Case / control frequencies | Chi square | <i>P</i> -value             |
|-------|-----|-----------|-----------------|----------------------------|------------|-----------------------------|
| H1    | 5   | TAC       | 0.741           | 0.718, 0.749               | 3.293      | 0.0696                      |
|       |     | GGG       | 0.194           | 0.192, 0.195               | 0.03       | 0.8632                      |
|       |     | GGC       | 0.03            | 0.052, 0.022               | 21.961     | <b>2.78×10<sup>-6</sup></b> |
|       |     | GAC       | 0.027           | 0.020, 0.030               | 2.365      | 0.1241                      |
| H2    | 5   | GA        | 0.649           | 0.636, 0.654               | 1.038      | 0.3083                      |
|       |     | AC        | 0.32            | 0.333, 0.315               | 1.096      | 0.2951                      |
|       |     | AA        | 0.028           | 0.023, 0.029               | 0.812      | 0.3674                      |
| H3    | 5   | AT        | 0.717           | 0.707, 0.721               | 0.713      | 0.3986                      |
|       |     | GC        | 0.219           | 0.242, 0.211               | 3.766      | 0.0523                      |
|       |     | AC        | 0.06            | 0.045, 0.066               | 5.372      | 0.0205                      |
| H4    | 5   | GC        | 0.659           | 0.651, 0.662               | 0.362      | 0.5474                      |
|       |     | TT        | 0.323           | 0.318, 0.324               | 0.108      | 0.7424                      |
|       |     | GT        | 0.012           | 0.015, 0.011               | 1.036      | 0.3087                      |
| H5    | 5   | CG        | 0.746           | 0.744, 0.746               | 0.015      | 0.9027                      |
|       |     | TT        | 0.238           | 0.233, 0.239               | 0.128      | 0.7208                      |
|       |     | TG        | 0.012           | 0.014, 0.011               | 0.446      | 0.5042                      |
| H6    | 15  | CG        | 0.556           | 0.551, 0.558               | 0.136      | 0.7118                      |
|       |     | TA        | 0.421           | 0.412, 0.424               | 0.455      | 0.4999                      |
|       |     | CA        | 0.019           | 0.034, 0.014               | 15.141     | <b>9.98×10<sup>-5</sup></b> |
| H7    | 15  | GTC       | 0.528           | 0.512, 0.534               | 1.248      | 0.264                       |
|       |     | ACT       | 0.406           | 0.396, 0.409               | 0.533      | 0.4652                      |
|       |     | ACC       | 0.039           | 0.034, 0.040               | 0.692      | 0.4054                      |
|       |     | ATC       | 0.019           | 0.039, 0.011               | 30.229     | <b>3.84×10<sup>-8</sup></b> |
| H8    | 15  | CC        | 0.531           | 0.523, 0.533               | 0.288      | 0.5915                      |
|       |     | TA        | 0.442           | 0.439, 0.443               | 0.047      | 0.828                       |
|       |     | CA        | 0.021           | 0.028, 0.019               | 2.663      | 0.1027                      |
| H9    | 15  | CG        | 0.587           | 0.576, 0.591               | 0.677      | 0.4105                      |
|       |     | TT        | 0.258           | 0.267, 0.255               | 0.473      | 0.4914                      |
|       |     | CT        | 0.149           | 0.147, 0.149               | 0.017      | 0.8958                      |
| H10   | 15  | GG        | 0.769           | 0.762, 0.772               | 0.353      | 0.5525                      |
|       |     | AA        | 0.181           | 0.177, 0.182               | 0.129      | 0.7192                      |
|       |     | AG        | 0.046           | 0.051, 0.044               | 0.716      | 0.3976                      |

Significant *P*-values were shown in bold.

Table S5. The association test results of imputed SNPs with nominal significance.

| SNP        | CHR | POS       | alleleA | alleleB | MAF    | P        | Function | Gene             |
|------------|-----|-----------|---------|---------|--------|----------|----------|------------------|
| rs11636500 | 15  | 82158686  | A       | C       | 0.0297 | 1.95E-09 | intron   | <i>EFTUD1</i>    |
| rs1849287  | 15  | 84559840  | C       | G       | 0.0365 | 2.91E-07 | intron   | <i>UBE2Q2P1</i>  |
| rs11630156 | 15  | 82025385  | A       | G       | 0.0717 | 2.31E-06 | unknown  | —                |
| rs17267218 | 15  | 82018946  | A       | C       | 0.0703 | 5.90E-06 | unknown  | —                |
| rs9788775  | 15  | 82018008  | A       | C       | 0.0703 | 6.10E-06 | unknown  | —                |
| rs7183805  | 15  | 82247090  | A       | G       | 0.0512 | 6.67E-05 | intron   | <i>EFTUD1</i>    |
| rs7162970  | 15  | 82009591  | C       | T       | 0.0982 | 0.0001   | unknown  | —                |
| rs2277566  | 15  | 82549415  | C       | T       | 0.0132 | 0.0004   | intron   | <i>CPEB1</i>     |
| rs7167818  | 15  | 83860332  | C       | T       | 0.0398 | 0.0004   | intron   | <i>ADAMTSL3</i>  |
| rs10220741 | 15  | 83884806  | A       | G       | 0.0401 | 0.0017   | intron   | <i>ADAMTSL3</i>  |
| rs12910606 | 15  | 82799903  | A       | C       | 0.1820 | 0.0068   | intron   | <i>FSD2</i>      |
| rs8041231  | 15  | 82830043  | G       | T       | 0.3784 | 0.0084   | intron   | <i>WHAMM</i>     |
| rs4362936  | 5   | 148138826 | C       | T       | 0.1009 | 0.0248   | unknown  | —                |
| rs12901468 | 15  | 84164180  | A       | G       | 0.0228 | 0.0381   | unknown  | —                |
| rs150968   | 15  | 84532635  | G       | T       | 0.0237 | 0.0436   | intron   | <i>UBE2Q2P1</i>  |
| rs2341203  | 15  | 84562455  | C       | T       | 0.0238 | 0.0455   | intron   | <i>UBE2Q2P1</i>  |
| rs2879971  | 15  | 84574237  | C       | T       | 0.0238 | 0.0460   | intron   | <i>LINC00933</i> |

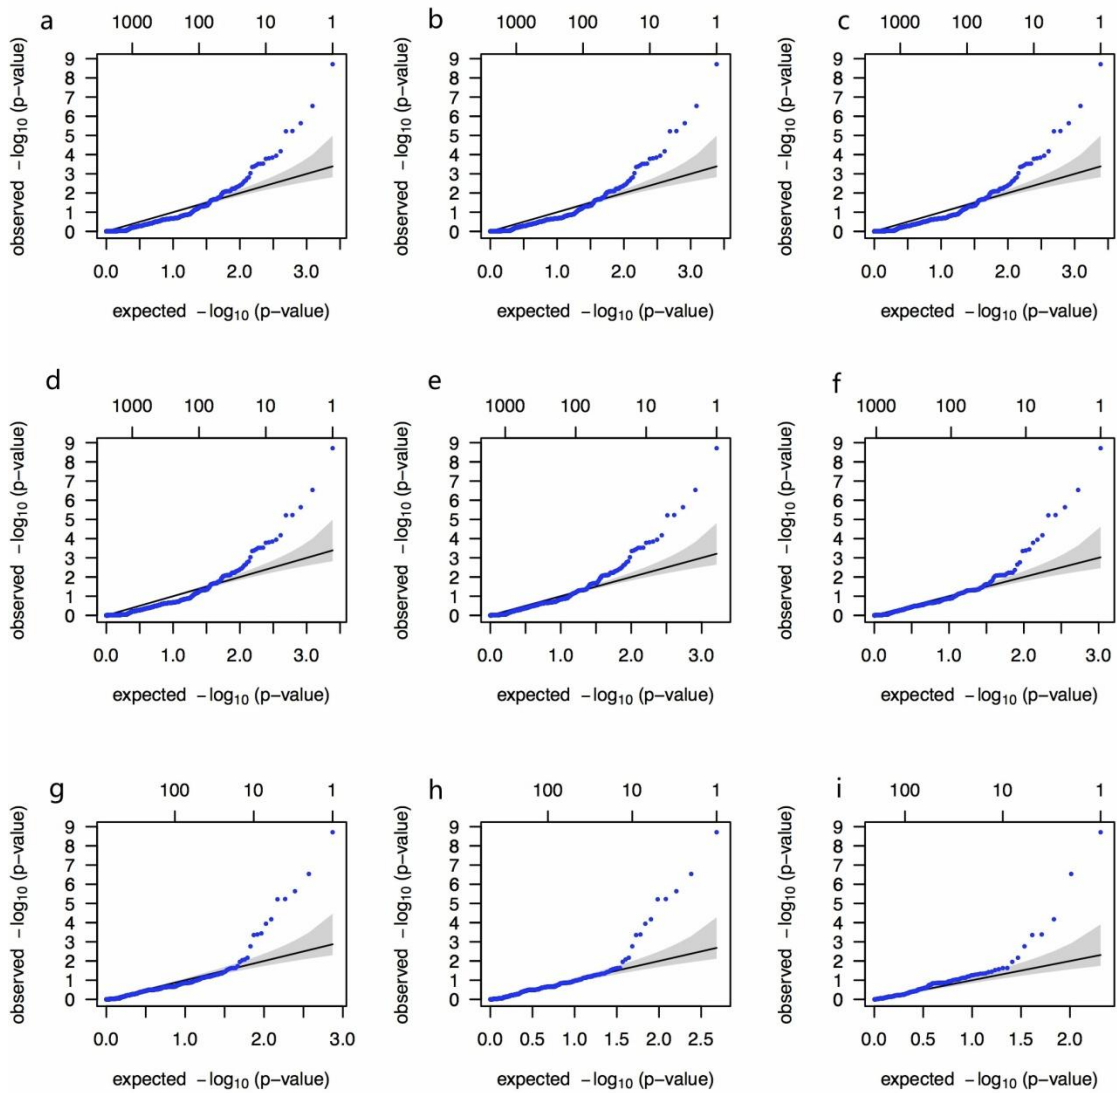

**Figure S1. The Q-Q plots made by association test results based on marker set filter by different certainty thresholds.** The certainty thresholds used in a, b, c, d, e, f, g, h, i are 0.1, 0.2, 0.3, 0.4, 0.5, 0.6, 0.7, 0.8, 0.9 respectively. No significant deviance from expected line could be found when certainty threshold was chosen as 0.8.



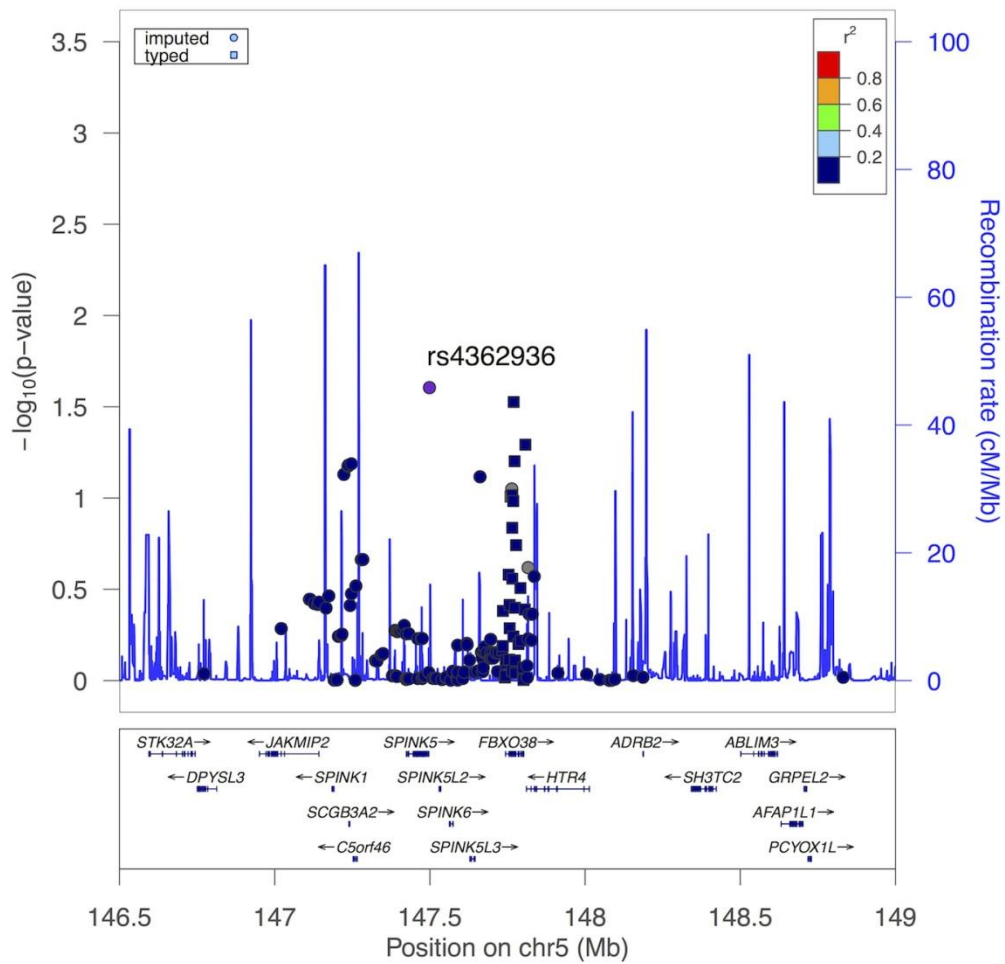

Figure S2. **Regional association plots based on imputed regions on chromosome 5.** Imputed SNPs were indicated as circle and genotyped SNPs were indicated as square. The most significant imputed SNP was chosen as reference SNP (rs4362936).

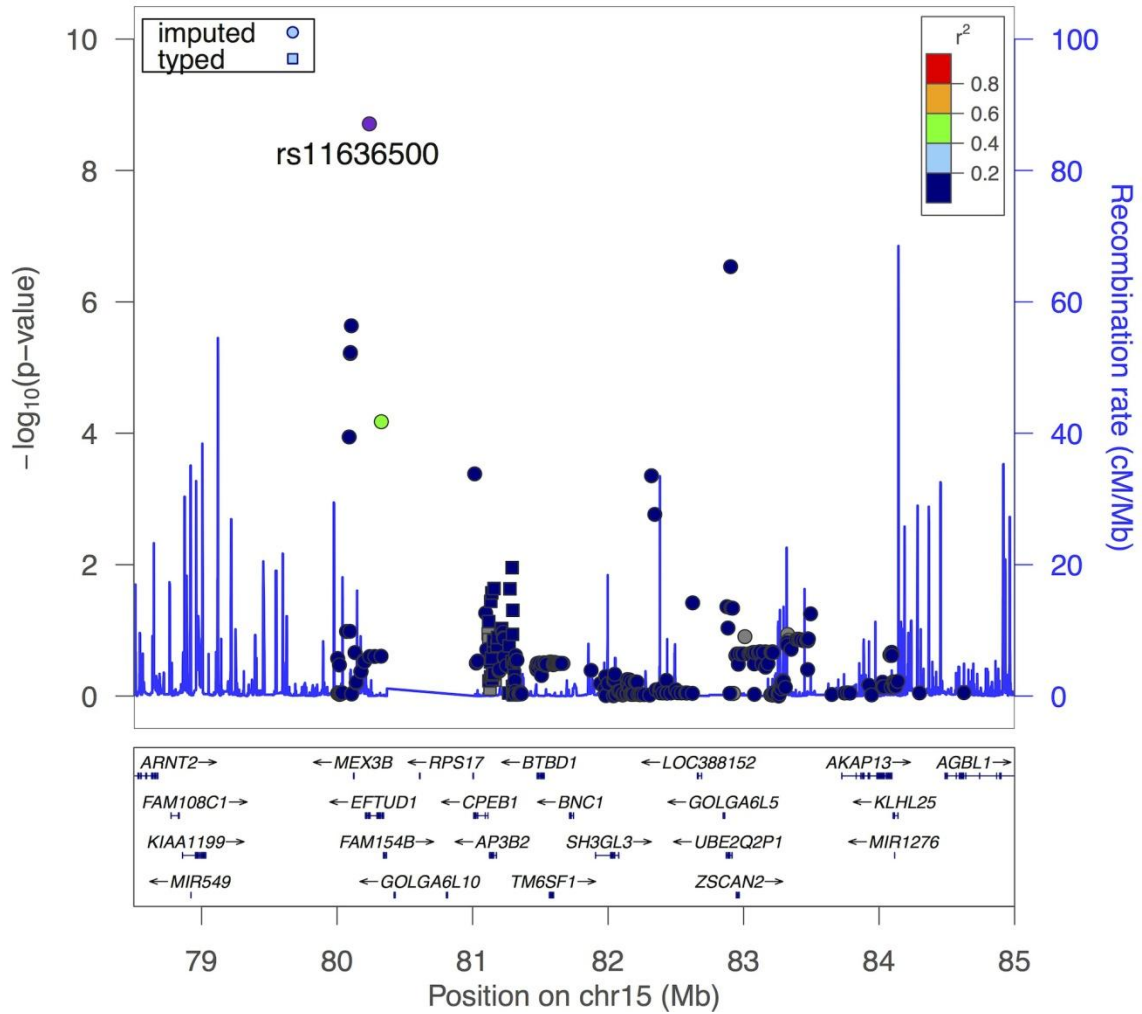

Figure S3. **Regional association plots based on imputed regions on chromosome 15.**

Imputed SNPs were indicated as circle and genotyped SNPs were indicated as square.

The most significant imputed SNP was chosen as reference SNP (rs1163650).
